# Supplementary material
Source: publisher site journal article supplement (https://www.dovepress.com/article/538018)
Supplement: Supplementary file 1 [file Supplementary%20materials%20%25252813%252529.docx]

**Supplementary materials**


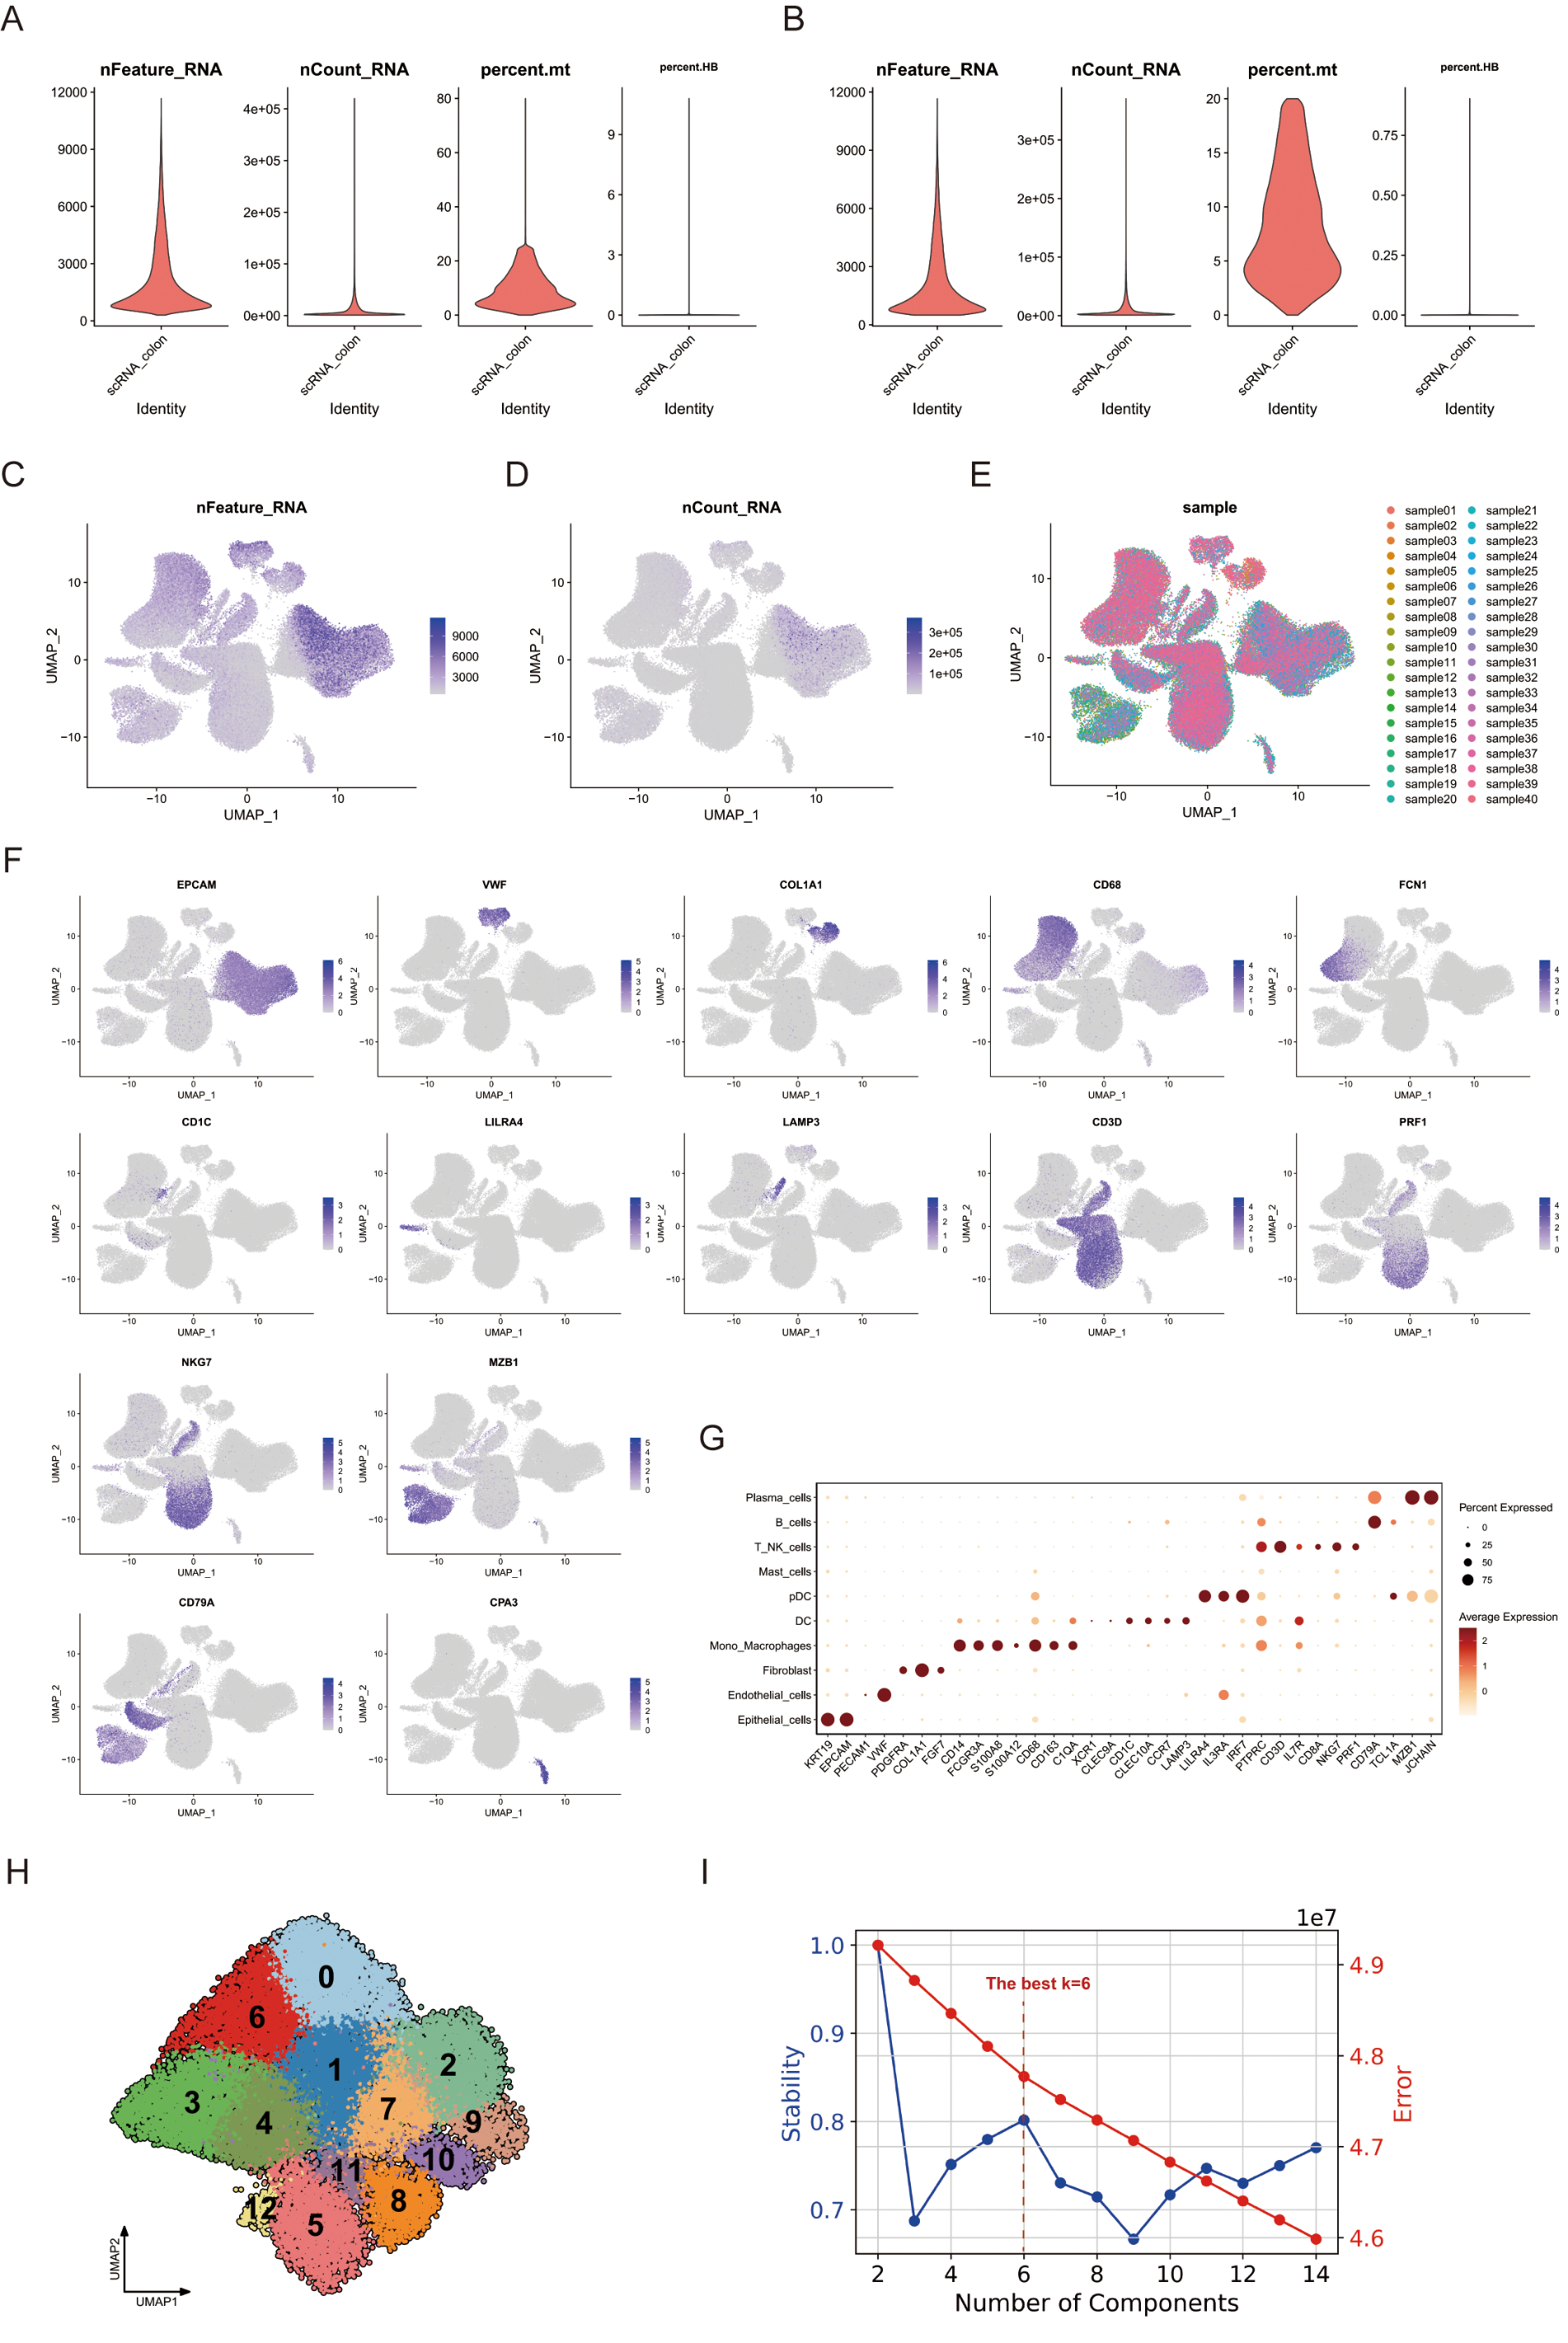


**Supplementary Figure 1. Analysis of the integrated data and cell cluster information.** **(A-D)** Overview of the stringent data quality control process. **(E)** UMAP visualization representing 89,960 cells derived from 40 samples. **(F)** UMAP plots illustrating the expression levels of selected marker genes across unsorted cells. **(G)** Dot plot showing the expression of marker genes in the specified cell clusters; the size of each dot indicates the percentage of genes expressed in each cluster, while the color represents the average expression level. **(H)** UMAP plot displaying an additional 12 clusters of epithelial cells. **(I)** Line chart illustrating the optimal K value and the identification of six components.


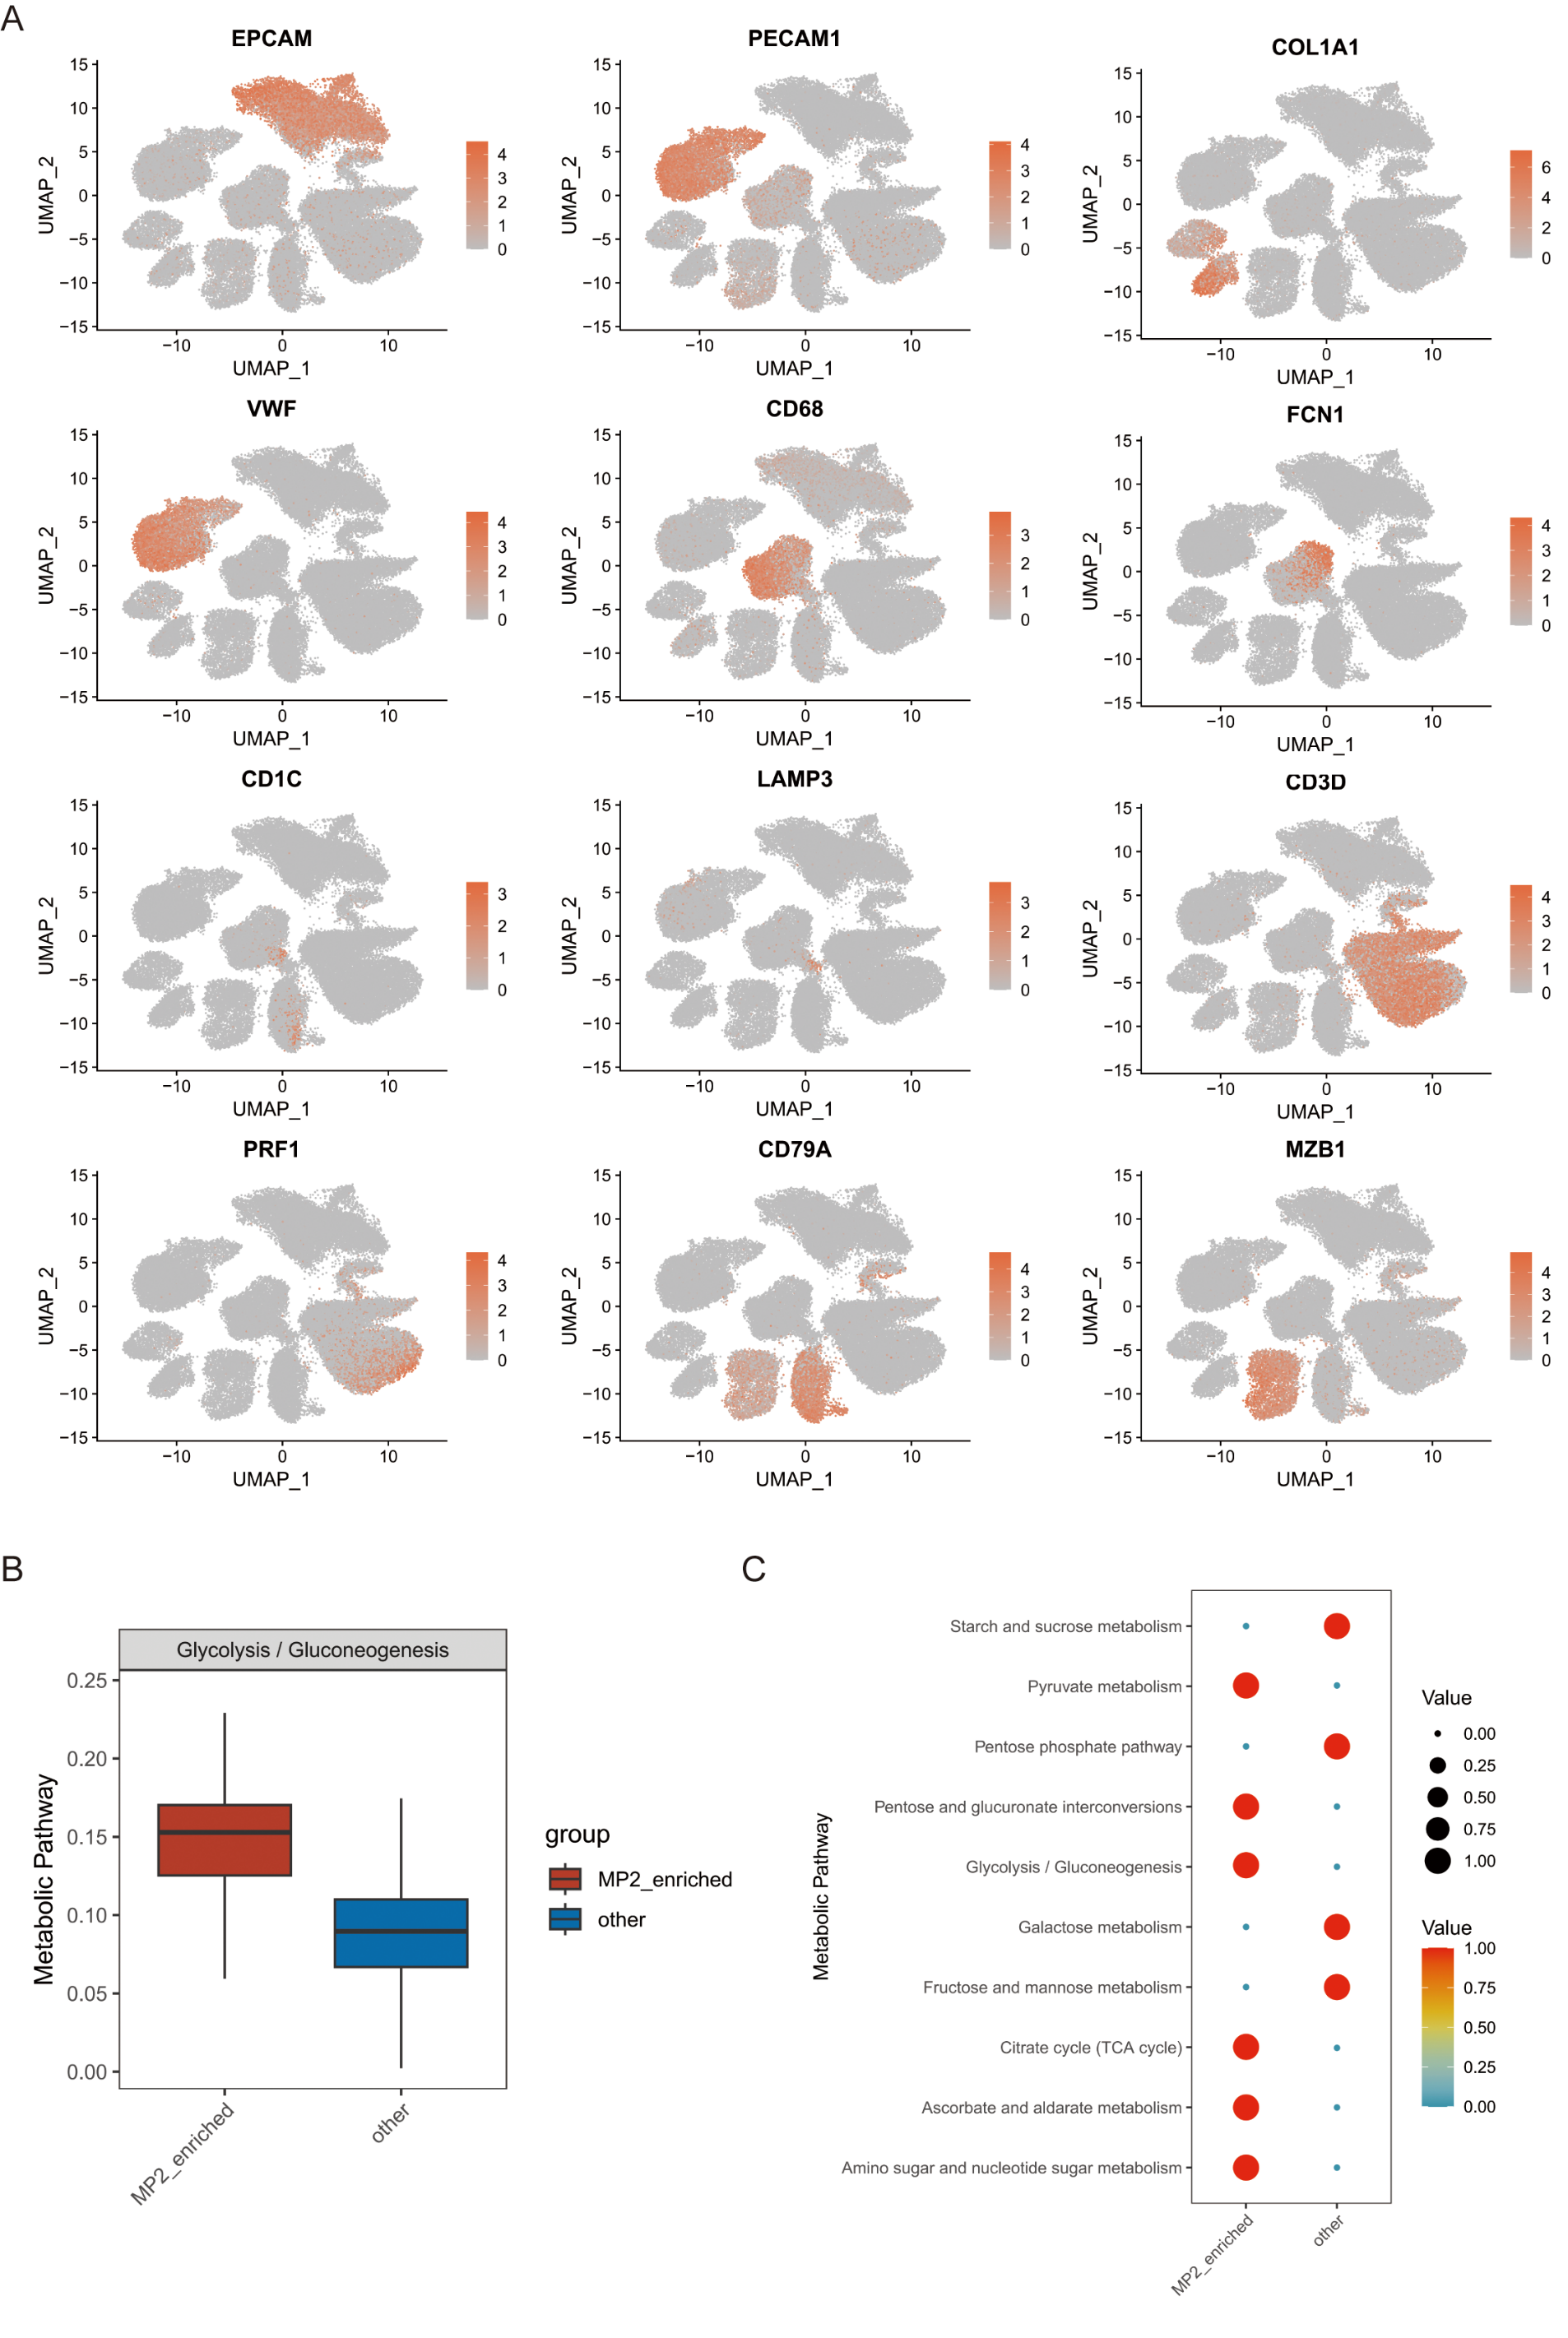


**Supplementary Figure 2. Single-cell RNA sequencing analysis of in-house data.** **(A)** UMAP plots illustrating the expression levels of specific marker genes. **(B)** Dot plot highlighting the differences in metabolic pathways between MP2 tumors and other sample types. **(C)** Box plot demonstrating the activation levels of glycolysis and gluconeogenesis pathways in MP2 tumors.


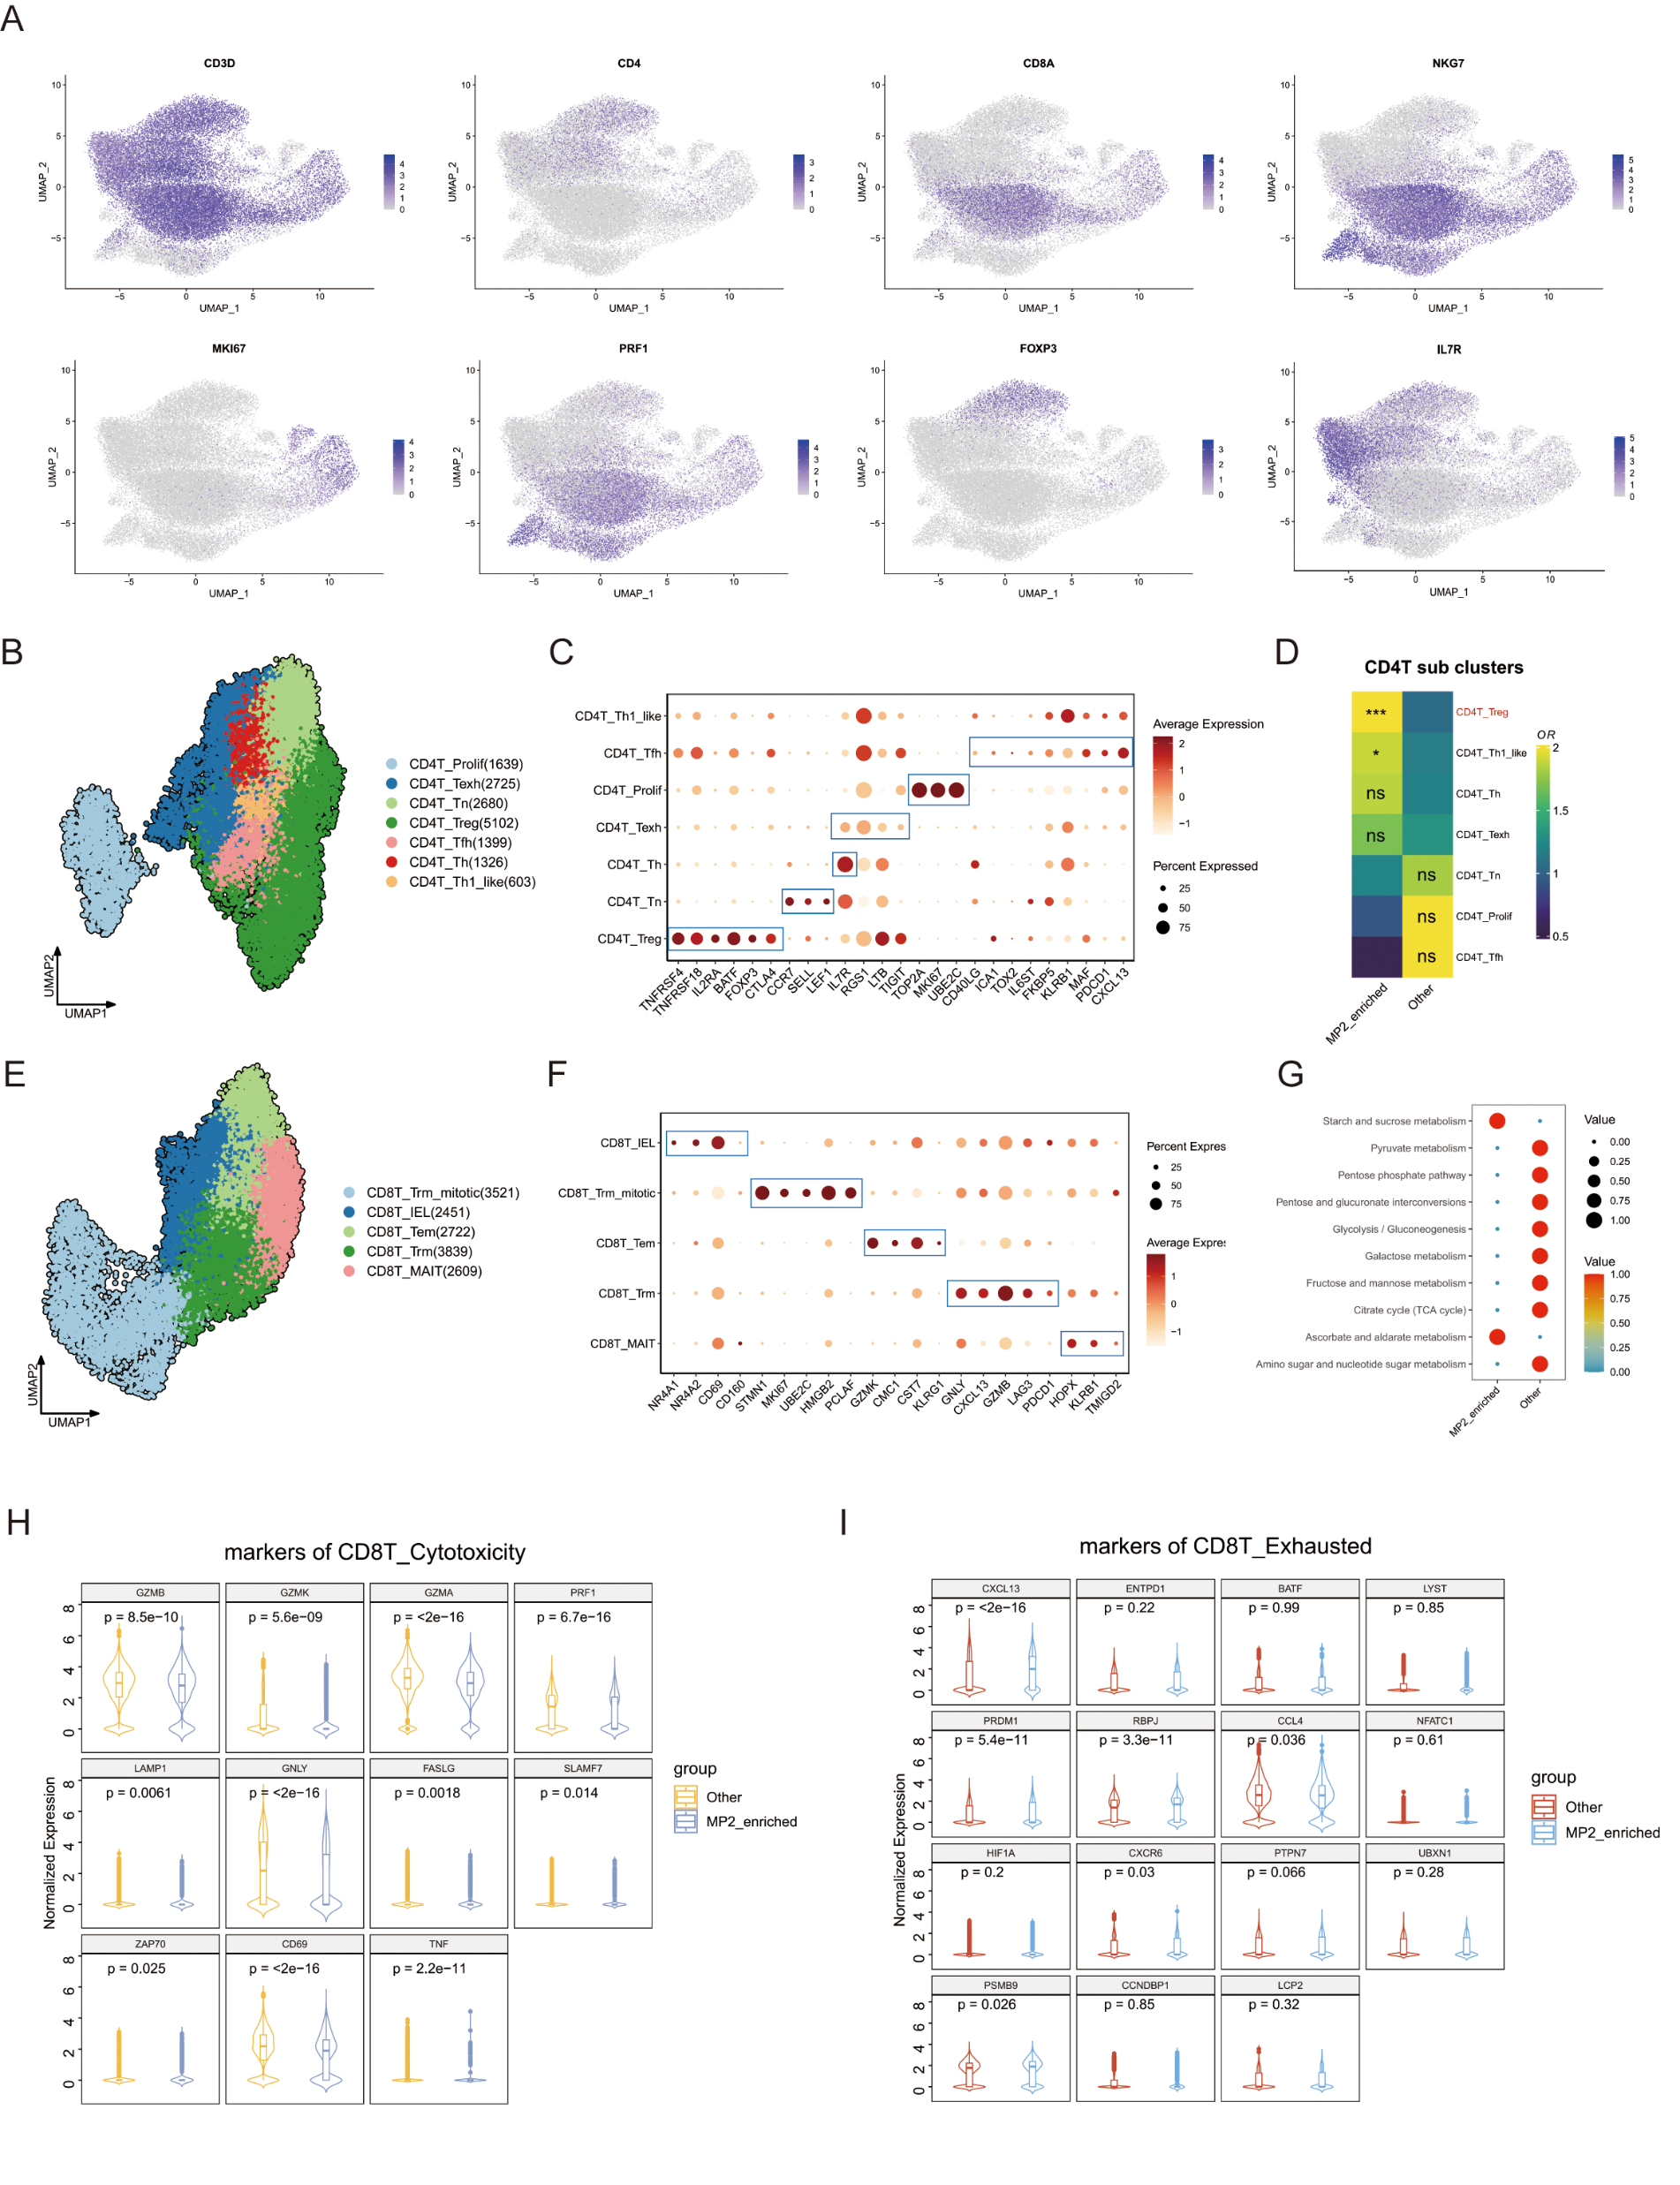


**Supplementary Figure 3. Analysis of T/NK cells subsets, related to Figure 3**. **(A)** UMAP plots illustrating the expression levels of specific marker genes. **(B)** UMAP representation of CD4 T cell subclusters. **(C)** Dot plot depicting the expression of marker genes within CD4 T cell clusters. **(D)** Odds ratio analysis comparing CD4 T cell clusters between MP2 tumors and other samples. **(E)** UMAP visualization of CD8 T cell subclusters. **(F)** Dot plot showing the expression of marker genes in CD8 T cell clusters. **(G)** Comparison of metabolic activities between MP2 tumors and other samples. **(H)** Expression levels of effector markers in MP2 tumors versus other samples. **(I)** Expression levels of exhaustion markers in MP2 tumors compared to other samples.


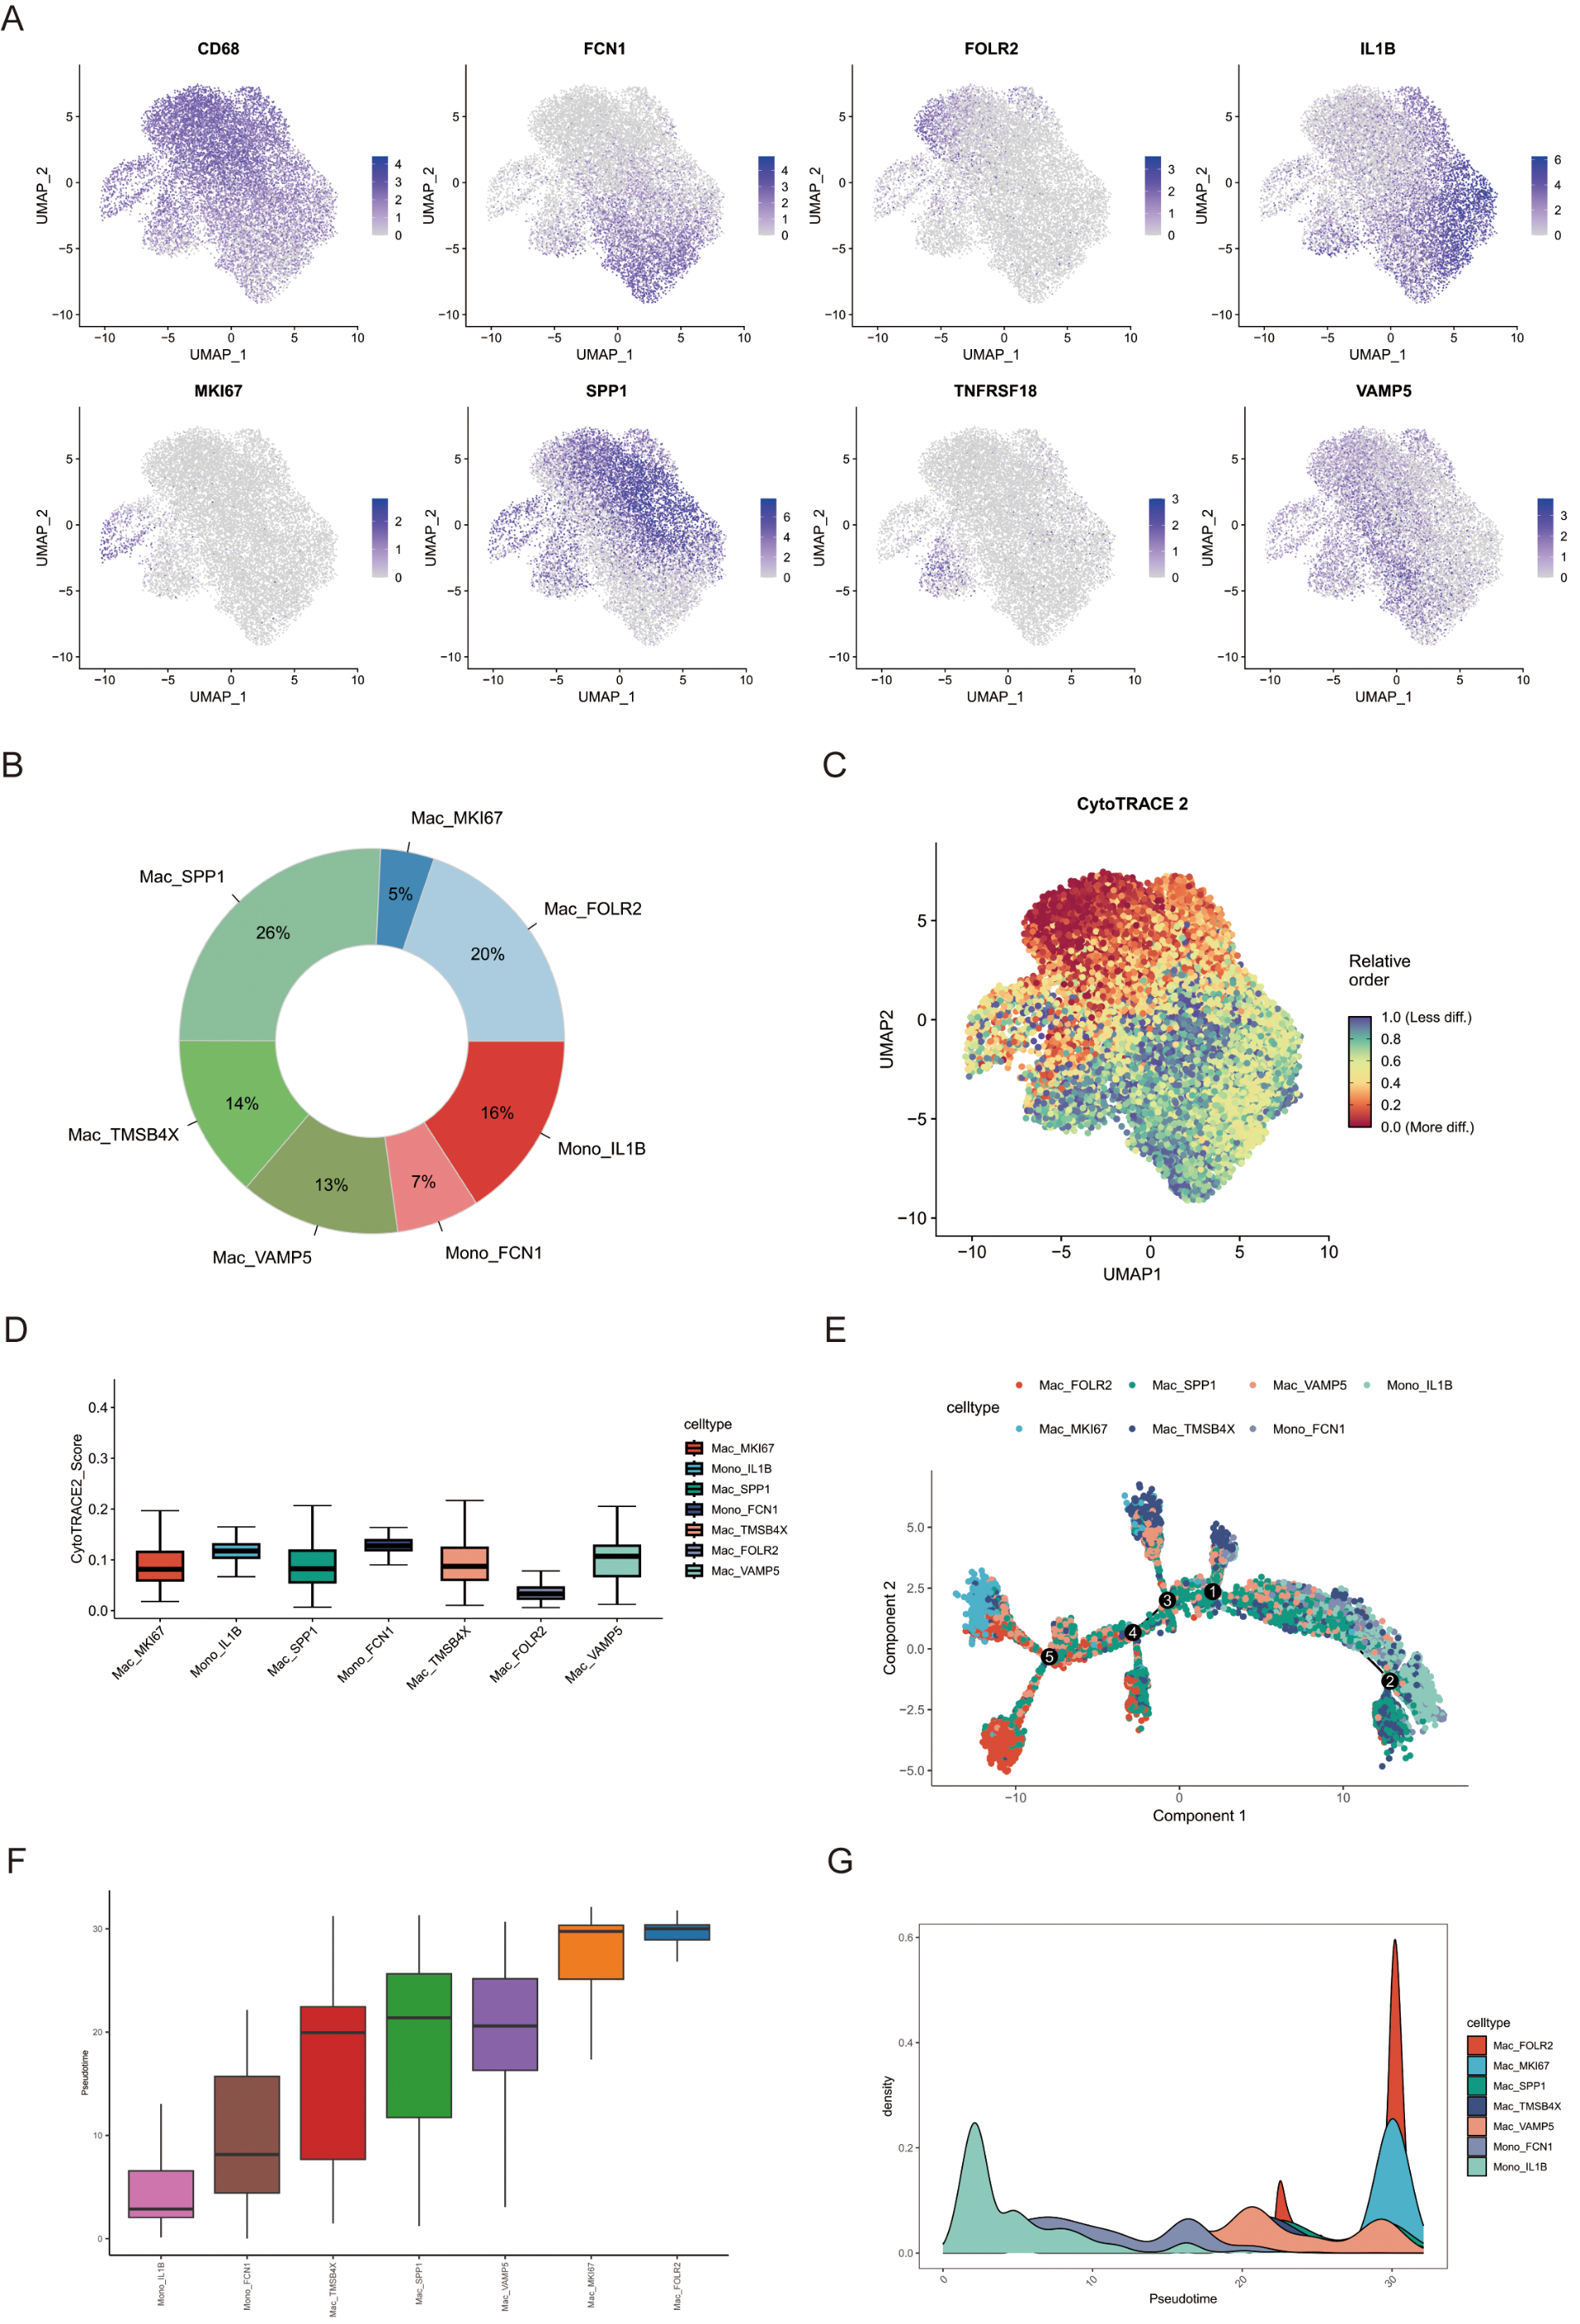


**Supplementary Figure 4. Analysis of monocytes and macrophages subsets, related to Figure 4.** **(A)** UMAP plots illustrating the expression levels of specific marker genes. **(B)** Donut chart presenting the percentages of various subclusters. **(C)** UMAP plot depicting the varying degrees of differentiation. **(D)** Cytotrace2 scores for different subclusters. **(E)** Monocle2 trajectory analysis of the different subclusters. **(F)** Box plot illustrating the differentiation trajectories of subclusters. **(G)** Changes in the density of differentiation among various subclusters over time.
